# Supplementary figures and images for: Identification of Potential Shade Response Regulators in Endangered Species Magnolia Sinostellata
Source: Research Square preprint supplement (doi:10.21203/rs.3.rs-701102/v1), 2021-07-21

**Figure S1.** Heat map of a sample-to-sample Pearson correlation


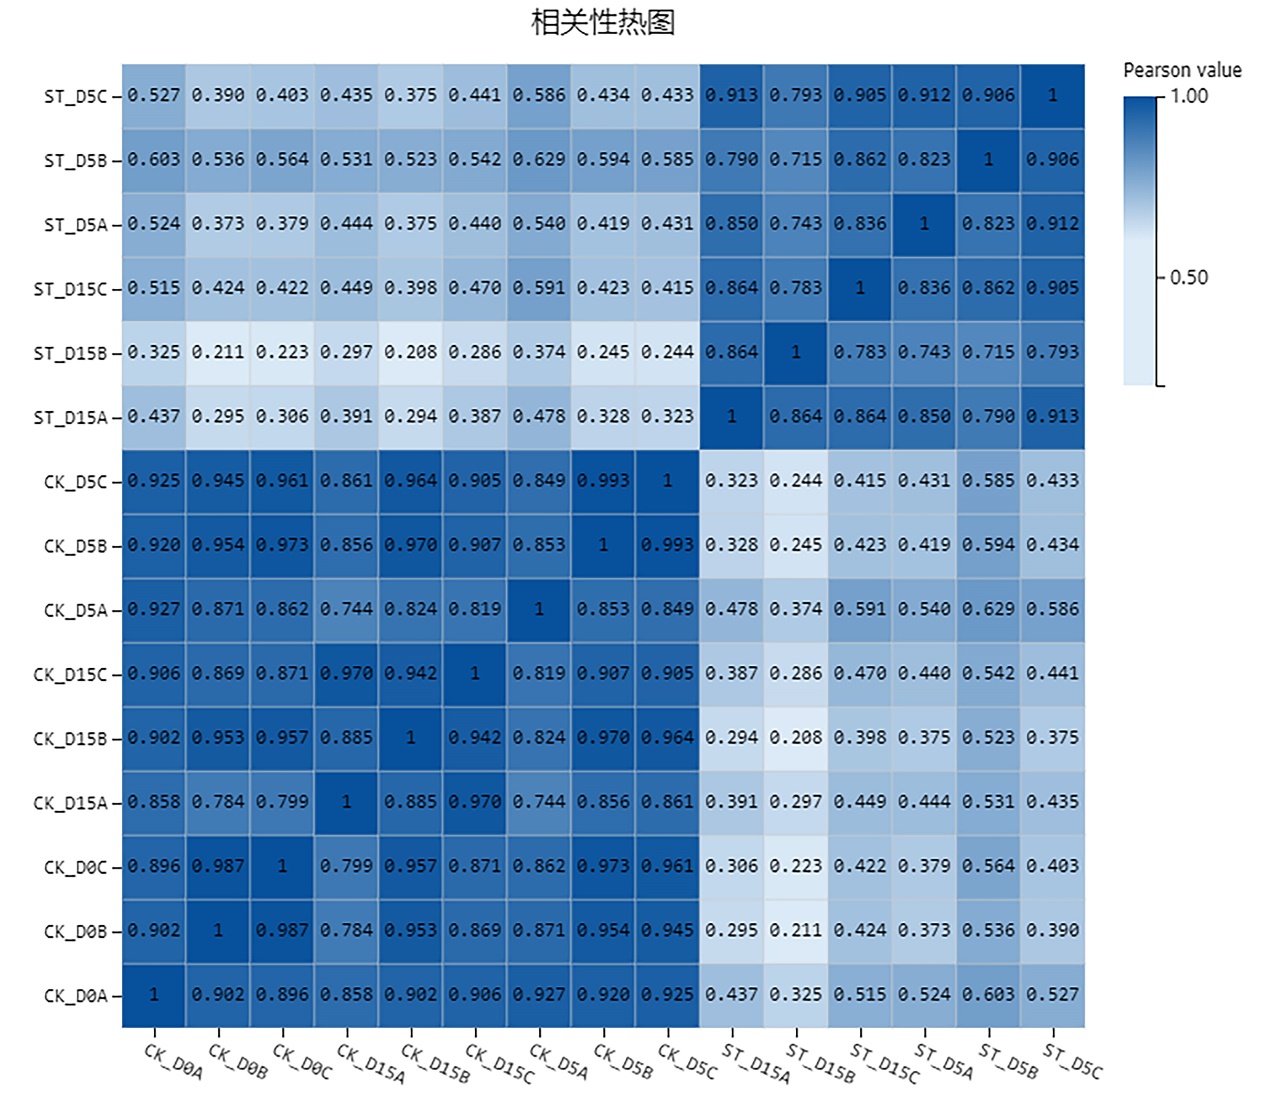

Supplement: Supplementary file 1 [file f9893aa025a28a175fcee53e.docx]
